# Supplementary material for: Singlet oxygen vs. triplet oxygen: functions of 2D-MoO3 catalysts in conquering catastrophic parasitic-reactions in lithium– and sodium–oxygen batteries
Source: Royal Society of Chemistry journal article supplement (doi:10.1039/d1ta00699a), 2021-01-01
Supplement: d1ta00699a1.pdf [file d1ta00699a1.pdf]

## **Electronic supporting information (ESI)**

### **Singlet oxygen vs triplet oxygen: functions of 2D-MoO<sub>3</sub> catalyst in conquering the catastrophic parasitic-reactions in lithium- and sodium-oxygen batteries**

Jia-Hui Li, Jie Wu, Yang-Xin Yu\*

*Laboratory of Chemical Engineering Thermodynamic, Department of Chemical  
Engineering, Tsinghua University, Beijing 100084, P. R. China*

\*Corresponding author. E-mail: [yangxyu@mail.tsinghua.edu.cn](mailto:yangxyu@mail.tsinghua.edu.cn)

Phone: +86-10-62782558

Fax: +86-10-62770304

Fig. S1 is the thermodynamic process used to exam the accuracy of our calculations. The following equation can be utilized to calculate  $\Delta G$ :

$$\Delta G = -E_b(\text{Li}) + \Delta G_1 + \Delta G_2 + E_b(\text{Li}_2\text{O}_2) \quad \text{* MERGEFORMAT (1)}$$

where  $E_b(\text{Li})$  and  $E_b(\text{Li}_2\text{O}_2)$  denote the binding energies of Li and  $\text{Li}_2\text{O}_2$ , respectively. The data we adopted could be acquired form Table S1.

Table S2 listed the static dielectric constant,<sup>1</sup> and refractive index<sup>1</sup> of ten aprotic solvents (Acetone, DE, DMSO, DMA, DMF, DME, MeCN, DEC, THF, DOL) for reorganization energy calculations. The calculated reorganization energies of  $\text{LiO}_2$  and  $\text{NaO}_2$  are also listed.

Fig. S2 are the partial density of states of (a)  $2\text{LiO}_2$ , (b)  $\text{Li}^3\text{O}_2^3\text{O}_2\text{Li}$ , (c)  $\text{Li}^1\text{O}_2^3\text{O}_2\text{Li}$ , (d)  $2\text{NaO}_2$ , (e)  $\text{Na}^3\text{O}_2^3\text{O}_2\text{Na}$ , (f)  $\text{Na}^1\text{O}_2^3\text{O}_2\text{Na}$  adsorbed the 2D- $\text{MoO}_3$  nanosheet.

Fig. S3 records the relationship between the static dielectric constant and the Gibbs free energy change (eV) of disproportionation reaction of (a) singlet and (b) triplet oxygen.

**Table S1.** Binding energies (in eV) of X,  $\text{XO}_2$  and  $\text{X}_2\text{O}_2$  (X=Li or Na) in LOBs or SOBs

| X=Li or Na  | $\text{O}_2$ | X     | $\text{XO}_2$ | $\text{X}_2\text{O}_2$ |
|-------------|--------------|-------|---------------|------------------------|
| LOBs (X=Li) | -0.698       | 3.689 | 1.566         | 4.321                  |
| SOBs (X=Na) | -0.698       | 3.578 | 2.166         | 7.366                  |

**Table S2.** The static dielectric constant, refractive index, and calculated reorganization energy (in eV) for  $\text{LiO}_2$  and  $\text{NaO}_2$

| Solvents | Static Dielectric Constant | Refractive Index | Reorganization Energy for $\text{LiO}_2$ | Reorganization Energy for $\text{NaO}_2$ |
|----------|----------------------------|------------------|------------------------------------------|------------------------------------------|
| Acetone  | 20.7                       | 1.359            | 1.199                                    | 0.702                                    |
| DE       | 4.335                      | 1.353            | 0.767                                    | 0.449                                    |
| DMSO     | 46.7                       | 1.479            | 1.059                                    | 0.621                                    |
| DMA      | 37.781                     | 1.437            | 1.113                                    | 0.652                                    |
| DMF      | 37.219                     | 1.431            | 1.122                                    | 0.657                                    |
| DME      | 7.3                        | 1.379            | 0.945                                    | 0.554                                    |
| MeCN     | 35.688                     | 1.344            | 1.278                                    | 0.748                                    |
| DEC      | 2.82                       | 1.384            | 0.407                                    | 0.238                                    |
| THF      | 7.4257                     | 1.407            | 0.901                                    | 0.528                                    |
| DOL      | 2.2189                     | 1.401            | 0.143                                    | 0.084                                    |

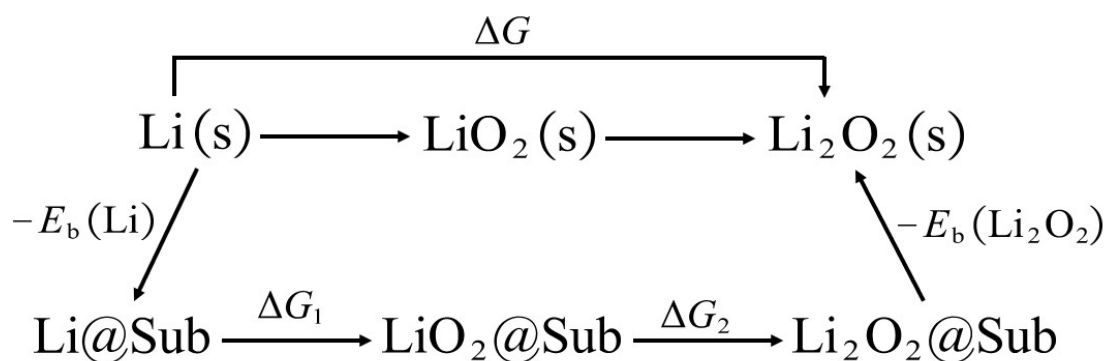

**Fig. S1** The thermodynamic process we choose to calculate and exam the Gibbs energy change of  $\text{Li}_2\text{O}_2$  ( $\Delta G$ ) in LOBs and SOBs.

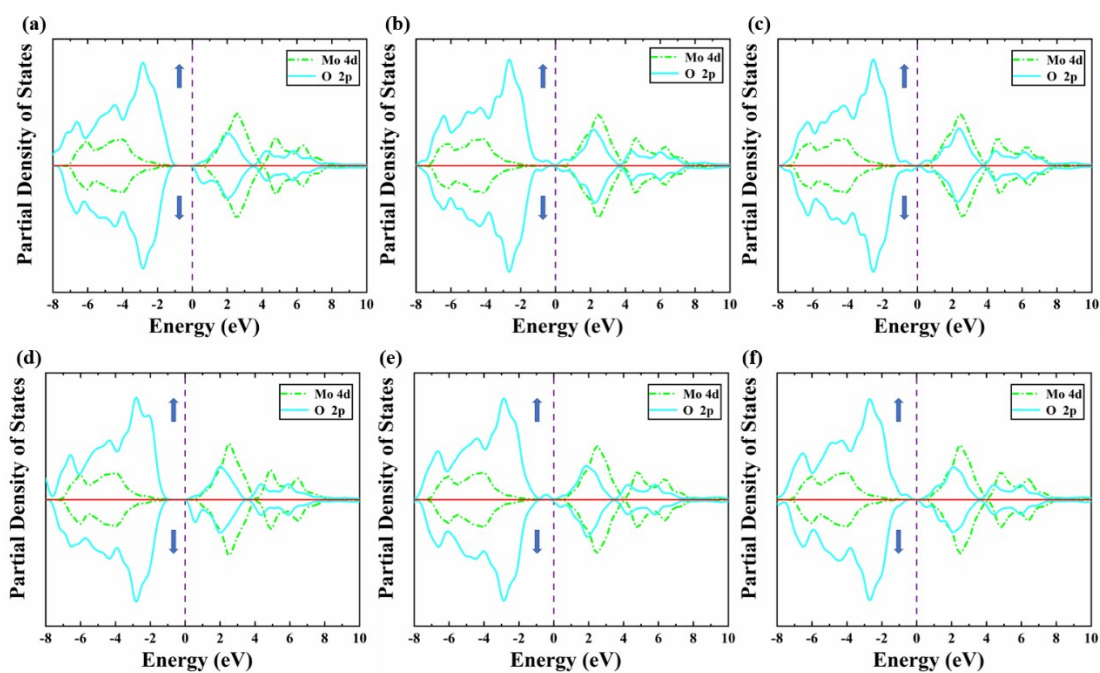

**Fig. S2** Partial density of states (PDOSs) of (a)  $2\text{LiO}_2$ , (b)  $\text{Li}^3\text{O}_2^3\text{O}_2\text{Li}$ , (c)  $\text{Li}^1\text{O}_2^3\text{O}_2\text{Li}$ , (d)  $2\text{NaO}_2$ , (e)  $\text{Na}^3\text{O}_2^3\text{O}_2\text{Na}$ , (f)  $\text{Na}^1\text{O}_2^3\text{O}_2\text{Na}$  adsorbed 2D-MoO<sub>3</sub>. The blue and green lines represent Mo 4d and O 2p orbitals, respectively. The two arrows ( $\uparrow$  and  $\downarrow$ ) in the figures demonstrate spin-up and spin-down electrons, respectively.

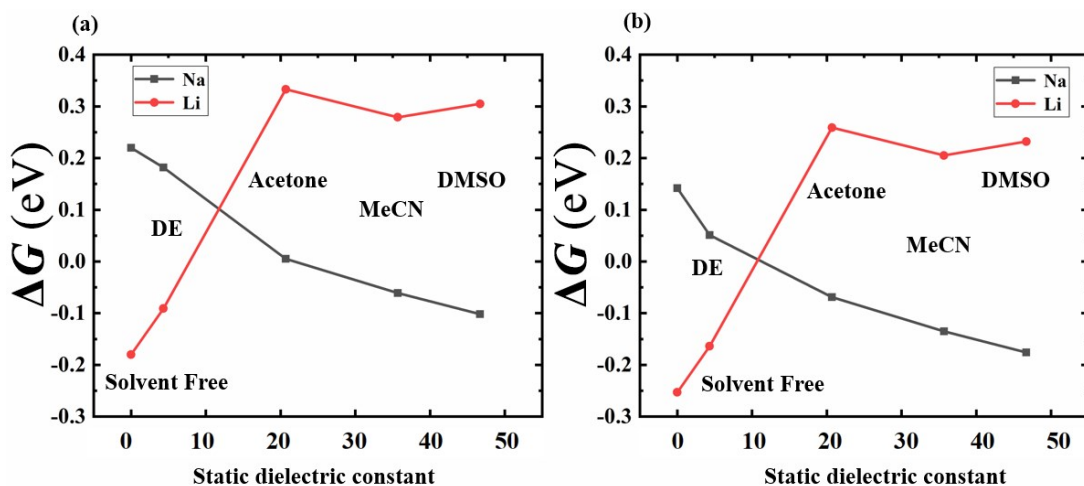

Fig. S3 The relationship between the static dielectric constant and the Gibbs energy change of disproportionation reaction of (a) singlet and (b) triplet oxygen.

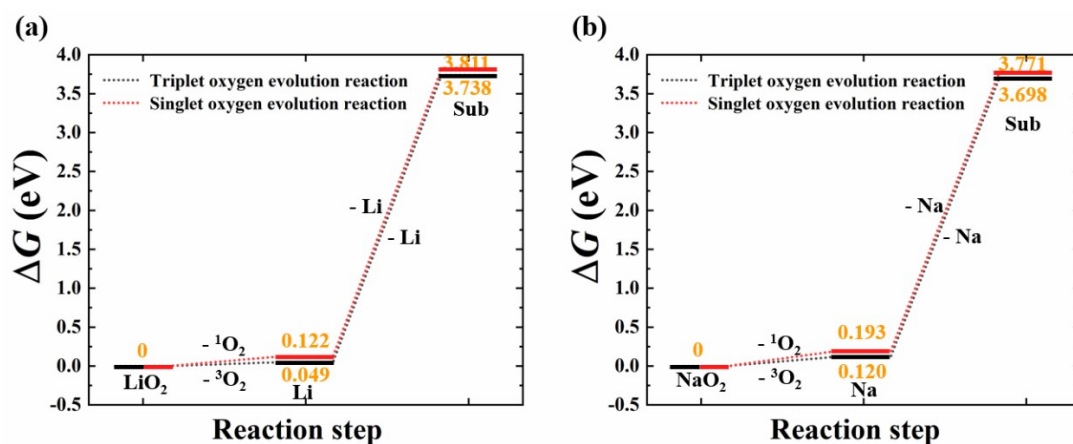

Fig. S4 Gibbs free energy changes of the evolution of  $XO_2$  for (a)  $X=Li$  and (b)  $X=Na$  at open circuit potential ( $U=0$  V).

## Reference

1. J. R. Rumble, D. R. Lide and T. J. Bruno, *CRC handbook of chemistry and physics : a ready-reference book of chemical and physical data*, Boca Raton : CRC Press, 99th edition / editor-in-chief John R. Rumble associate editors, David R. Lide, Thomas J. Bruno.. edn., 2018.
